# Supplementary material for: Single-cell RNA sequencing data analysis of the inner ear in gentamicin-treated mice via intraperitoneal injection
Source: Open Med (Wars). 2025 Nov 21;20(1):20251242. doi: 10.1515/med-2025-1242 (PMC12658731; doi:10.1515/med-2025-1242)
Supplement: Supplementary Table [file med-2025-1242-sm.xlsx]

## Sheet: SpecialGO
ID	Description	GeneRatio	BgRatio	pvalue	p.adjust	qvalue	geneID	Count
GO:0050727	regulation of inflammatory response	44/749	372/23328	9.54188e-14	9.86124e-12	5.40946e-12	Il1b/CCl3/Ptgs2/Stk39/Ctss/CCr7/Il2ra/Hspd1/Mif/CCr2/Trem2/Ctsc/Nupr1/Gbp5/Cx3cr1/Cst7/Ctla2a/CCl5/Xcl1/Cd28/Gata3/Cdh5/Cd200/Ace/Nr1d1/Apoe/Ifng/Gpx2/Apod/Syt11/Pmp22/Ednrb/Ptgis/Serpinf1/Igf1/Aoc3/Lpl/Serpine1/Fcer1a/Alox15/Il6/Snca/Il1rl1/Dnase1	44
GO:0150076	neuroinflammatory response	16/749	70/23328	5.36e-10	1.87194e-08	1.02686e-08	Il1b/Ptgs2/Jun/Trem2/Ctsc/Nupr1/Cx3cr1/Cst7/Cd200/Nr1d1/Clu/Ifng/Syt11/Igf1/C1qa/Snca	16
GO:0050729	positive regulation of inflammatory response	23/749	152/23328	6.6209e-10	2.23918e-08	1.22832e-08	Il1b/CCl3/Ptgs2/Ctss/CCr7/Hspd1/Mif/CCr2/Trem2/Ctsc/Nupr1/Gbp5/CCl5/Cd28/Ace/Ifng/Aoc3/Lpl/Serpine1/Fcer1a/Il6/Snca/Il1rl1	23
GO:0002526	acute inflammatory response	19/749	110/23328	2.09989e-09	6.2552e-08	3.43133e-08	Il1b/Ptgs2/Il1a/Icam1/CCr7/Mif/Fn1/Nupr1/Elane/CCl5/Serpinb9/Saa3/Cxcl1/F3/Ednrb/Aoc3/Fcer1a/Il6/Dnase1	19
GO:0006979	response to oxidative stress	37/749	409/23328	1.71461e-08	4.21494e-07	2.31214e-07	Ptgs2/Fos/Jun/CCr7/Hsph1/Hmox1/Nr4a2/Prdx2/Mpo/Lck/Epas1/Hspb1/Apoe/Rcan1/Sod3/Aldh1a1/Cryab/Gpx2/Gpx3/Apod/Mt3/Gpr37l1/Mapt/Fbln5/Axl/Mmp2/Pdgfra/Cygb/Car3/Cd36/Cyp11a1/Il6/Slc4a1/Snca/Aqp1/Pax2/Gpr37	37
GO:0150077	regulation of neuroinflammatory response	9/749	27/23328	9.63912e-08	1.87021e-06	1.02592e-06	Ptgs2/Trem2/Ctsc/Nupr1/Cst7/Cd200/Nr1d1/Syt11/Igf1	9
GO:0002269	leukocyte activation involved in inflammatory response	11/749	48/23328	2.65518e-07	4.42298e-06	2.42626e-06	Jun/Trem2/Ctsc/Cx3cr1/Cst7/Nr1d1/Clu/Ifng/Syt11/C1qa/Snca	11
GO:0002673	regulation of acute inflammatory response	10/749	55/23328	8.67576e-06	8.80442e-05	4.82973e-05	Il1b/Ptgs2/CCr7/Mif/CCl5/Ednrb/Aoc3/Fcer1a/Il6/Dnase1	10
GO:0002675	positive regulation of acute inflammatory response	8/749	37/23328	1.83926e-05	0.000161142	8.83955e-05	Il1b/Ptgs2/CCr7/Mif/CCl5/Aoc3/Fcer1a/Il6	8
GO:0150079	negative regulation of neuroinflammatory response	5/749	12/23328	2.21005e-05	0.00018969	0.000104056	Cst7/Cd200/Nr1d1/Syt11/Igf1	5
GO:0034599	cellular response to oxidative stress	23/749	276/23328	3.22365e-05	0.000257485	0.000141245	Fos/Jun/Hsph1/Hmox1/Nr4a2/Prdx2/Mpo/Epas1/Hspb1/Sod3/Mt3/Gpr37l1/Mapt/Fbln5/Axl/Mmp2/Pdgfra/Cd36/Il6/Snca/Aqp1/Pax2/Gpr37	23
GO:0050728	negative regulation of inflammatory response	15/749	156/23328	0.000157298	0.000995698	0.000546198	Il2ra/Cx3cr1/Cst7/Ctla2a/Gata3/Cdh5/Cd200/Nr1d1/Apoe/Gpx2/Apod/Syt11/Ptgis/Serpinf1/Igf1	15
GO:0090594	inflammatory response to wounding	4/749	15/23328	0.0010844	0.00485108	0.0026611	Il1a/CCr2/Hmox1/Timp1	4
GO:1900119	positive regulation of execution phase of apoptosis	4/749	17/23328	0.00179654	0.00710202	0.00389587	Igfbp3/Ptgis/Fap/Il6	4
GO:0002437	inflammatory response to antigenic stimulus	8/749	71/23328	0.00194542	0.00753757	0.00413479	Icam1/CCr7/Il2ra/Elane/Cd28/Serpinb9/Gpx2/Fcer1a	8
GO:0002438	acute inflammatory response to antigenic stimulus	5/749	32/23328	0.00330161	0.0117576	0.00644973	Icam1/CCr7/Elane/Serpinb9/Fcer1a	5
GO:0002523	leukocyte migration involved in inflammatory response	4/749	24/23328	0.00671348	0.0205456	0.0112705	CCl2/Elane/Ptn/Aoc3	4
GO:1900117	regulation of execution phase of apoptosis	4/749	31/23328	0.0166641	0.0429231	0.0235458	Igfbp3/Ptgis/Fap/Il6	4
GO:0097194	execution phase of apoptosis	6/749	68/23328	0.0218316	0.053486	0.0293401	Top2a/Cecr2/Igfbp3/Ptgis/Fap/Il6	6
GO:0002863	positive regulation of inflammatory response to antigenic stimulus	3/749	21/23328	0.0285021	0.0669146	0.0367065	CCr7/Cd28/Fcer1a	3
GO:0002861	regulation of inflammatory response to antigenic stimulus	4/749	38/23328	0.0328214	0.0756595	0.0415036	CCr7/Cd28/Gpx2/Fcer1a	4
GO:0006979	response to oxidative stress	39/813	409/23328	1.52855e-08	5.41387e-07	3.28418e-07	Ptgs2/Hmox1/Mapk3/Cst3/Met/Idh1/Apoe/Fos/Mpo/Slc4a1/Aqp1/Snca/Aldh1a1/Cd36/Prdx2/Ncoa7/Epas1/Hspb1/Fbln5/App/Rcan1/Diablo/Mmp2/Pdgfra/Cyp1b1/Sod3/Cryab/Apod/Axl/Gpx3/Gpx2/Srxn1/Rcan2/Mt3/Mapt/Il6/Ptprn/Nol3/Smpd3	39
GO:0034599	cellular response to oxidative stress	26/813	276/23328	4.74034e-06	6.77259e-05	4.10841e-05	Hmox1/Mapk3/Met/Fos/Mpo/Aqp1/Snca/Cd36/Prdx2/Ncoa7/Epas1/Hspb1/Fbln5/App/Diablo/Mmp2/Pdgfra/Cyp1b1/Sod3/Axl/Srxn1/Mt3/Mapt/Il6/Nol3/Smpd3	26
GO:0150076	neuroinflammatory response	12/813	70/23328	4.91554e-06	6.92703e-05	4.2021e-05	Ptgs2/Cx3cr1/Nr1d1/Cst7/Trem2/Snca/Cd200/App/Clu/C1qa/Syt11/Igf1	12
GO:0150077	regulation of neuroinflammatory response	7/813	27/23328	2.93466e-05	0.000317911	0.000192852	Ptgs2/Nr1d1/Cst7/Trem2/Cd200/Syt11/Igf1	7
GO:0150079	negative regulation of neuroinflammatory response	5/813	12/23328	3.27936e-05	0.000351441	0.000213192	Nr1d1/Cst7/Cd200/Syt11/Igf1	5
GO:0002269	leukocyte activation involved in inflammatory response	9/813	48/23328	3.58997e-05	0.000374286	0.000227051	Cx3cr1/Nr1d1/Cst7/Trem2/Snca/App/Clu/C1qa/Syt11	9
GO:0002526	acute inflammatory response	13/813	110/23328	0.000119657	0.00101974	0.000618596	Ptgs2/Il1a/Fn1/Cxcl1/CCl5/Elane/F3/Ednrb/Aoc3/Il6/Kl/Serpina3n/Dnase1	13
GO:0050727	regulation of inflammatory response	28/813	372/23328	0.000124013	0.0010497	0.000636771	Ptgs2/Lpl/Ctss/Cx3cr1/Apoe/Nr1d1/CCl5/Xcl1/Ctla2a/Cst7/Pld3/Trem2/Snca/Cd200/Ace/Ptgis/Serpinf1/Mdk/Apod/Pmp22/Gpx2/Serpine1/Syt11/Ednrb/Aoc3/Il6/Dnase1/Igf1	28
GO:0002523	leukocyte migration involved in inflammatory response	5/813	24/23328	0.00124297	0.00682881	0.00414251	CCl2/Elane/Ptn/Mdk/Aoc3	5
GO:1900119	positive regulation of execution phase of apoptosis	4/813	17/23328	0.00242436	0.0116528	0.00706884	Igfbp3/Ptgis/Fap/Il6	4
GO:0050728	negative regulation of inflammatory response	13/813	156/23328	0.00327156	0.0147457	0.00894505	Cx3cr1/Apoe/Nr1d1/Ctla2a/Cst7/Cd200/Ptgis/Serpinf1/Mdk/Apod/Gpx2/Syt11/Igf1	13
GO:0002673	regulation of acute inflammatory response	6/813	55/23328	0.0119503	0.0394968	0.0239597	Ptgs2/CCl5/Ednrb/Aoc3/Il6/Dnase1	6
GO:0090594	inflammatory response to wounding	3/813	15/23328	0.0140261	0.0442491	0.0268425	Il1a/Hmox1/Mdk	3
GO:0050729	positive regulation of inflammatory response	11/813	152/23328	0.0176373	0.0532855	0.0323242	Ptgs2/Lpl/Ctss/CCl5/Trem2/Snca/Ace/Mdk/Serpine1/Aoc3/Il6	11
GO:1900117	regulation of execution phase of apoptosis	4/813	31/23328	0.0218223	0.0620971	0.0376695	Igfbp3/Ptgis/Fap/Il6	4
GO:0002675	positive regulation of acute inflammatory response	4/813	37/23328	0.0389362	0.0978106	0.0593341	Ptgs2/CCl5/Aoc3/Il6	4
GO:0006979	response to oxidative stress	37/807	409/23328	1.14485e-07	3.23591e-06	1.94555e-06	Fos/Mapk3/Mpo/Hsph1/Slc4a1/Aqp1/Snca/Aldh1a1/Cd36/Prdx2/Ncoa7/Nr4a2/Idh1/Apoe/Rbpms/App/Gpx3/Ptprn/Nol3/Mapt/Mt3/Srxn1/Rcan2/Rcan1/Epas1/Hspb1/Fbln5/Sod3/Cryab/Gpx2/Apod/Mmp2/Cyp1b1/Car3/Gpr37l1/Akr1c18/Cygb	37
GO:0050727	regulation of inflammatory response	33/807	372/23328	8.56489e-07	1.7659e-05	1.06172e-05	Socs3/Hspd1/Mif/Ctss/Lpl/Cst7/Snca/CCr2/Cx3cr1/Ctsc/Gbp5/Apoe/Nr1d1/CCl5/Xcl1/Ifng/Gata3/Ctla2a/Pld3/Syt11/Ace/Fabp4/Gpx2/Apod/Mdk/Aoc3/Serpinf1/Pmp22/Ednrb/Krt1/Serpine1/Isl1/Igf1	33
GO:0002269	leukocyte activation involved in inflammatory response	10/807	48/23328	4.60858e-06	6.91696e-05	4.15873e-05	Cst7/Snca/Cx3cr1/Ctsc/Nr1d1/App/Ifng/Clu/Syt11/C1qa	10
GO:0150076	neuroinflammatory response	11/807	70/23328	2.66554e-05	0.000295189	0.000177478	Cst7/Snca/Cx3cr1/Ctsc/Nr1d1/App/Ifng/Clu/Syt11/C1qa/Igf1	11
GO:0034599	cellular response to oxidative stress	23/807	276/23328	9.94975e-05	0.000856794	0.000515136	Fos/Mapk3/Mpo/Hsph1/Aqp1/Snca/Cd36/Prdx2/Ncoa7/Nr4a2/App/Nol3/Mapt/Mt3/Srxn1/Epas1/Hspb1/Fbln5/Sod3/Mmp2/Cyp1b1/Gpr37l1/Akr1c18	23
GO:0002523	leukocyte migration involved in inflammatory response	6/807	24/23328	0.000132693	0.00108029	0.000649508	Elane/Rtn4/CCl2/Ptn/Mdk/Aoc3	6
GO:0050729	positive regulation of inflammatory response	15/807	152/23328	0.000263305	0.00191604	0.001152	Hspd1/Mif/Ctss/Lpl/Snca/CCr2/Ctsc/Gbp5/CCl5/Ifng/Ace/Fabp4/Mdk/Aoc3/Serpine1	15
GO:0050728	negative regulation of inflammatory response	15/807	156/23328	0.000348881	0.00241738	0.00145342	Socs3/Cst7/Cx3cr1/Apoe/Nr1d1/Gata3/Ctla2a/Syt11/Gpx2/Apod/Mdk/Serpinf1/Krt1/Isl1/Igf1	15
GO:0150079	negative regulation of neuroinflammatory response	4/807	12/23328	0.000563419	0.00354549	0.00213168	Cst7/Nr1d1/Syt11/Igf1	4
GO:0090594	inflammatory response to wounding	4/807	15/23328	0.00143008	0.00721012	0.00433499	Il1a/CCr2/F2r/Mdk	4
GO:0150077	regulation of neuroinflammatory response	5/807	27/23328	0.00209657	0.00983703	0.00591438	Cst7/Ctsc/Nr1d1/Syt11/Igf1	5
GO:0002526	acute inflammatory response	9/807	110/23328	0.0141461	0.0437228	0.0262877	Il1a/Cxcl1/Mif/Elane/Fn1/CCl5/F3/Aoc3/Ednrb	9
GO:0002039	p53 binding	6/791	71/22669	0.0373754	0.14081	0.103571	Npm1/Hspd1/Gata1/Msx1/Dusp26/Trim29	6
mmu04115	p53 signaling pathway	11/418	72/9040	0.000427294	0.00563252	0.00423206	Cdk6/Rrm2/Steap3/CCnd1/CCnd2/Perp/Igfbp3/Sfn/Serpinb5/Serpine1/Igf1	11
GO:0043409	negative regulation of MAPK cascade	14/749	173/23328	0.0014356	0.00604312	0.003315	Il1b/Atf3/Hsph1/Errfi1/Klf4/Timp3/Cav1/Spry4/Apoe/Sfrp5/F2rl1/Sfrp1/Sfrp4/Igf1	14
GO:0000187	activation of MAPK activity	11/749	119/23328	0.00158093	0.00647197	0.00355025	Il1b/Stk39/Ighm/CCr7/Cd74/Prdx2/Lpar1/Igf1/Igfbp6/Gdf15/Fcer1a	11
GO:0032873	negative regulation of stress-activated MAPK cascade	5/749	45/23328	0.0142479	0.0376179	0.0206356	Hsph1/Sfrp5/F2rl1/Sfrp1/Sfrp4	5
GO:0000187	activation of MAPK activity	11/813	119/23328	0.00298465	0.0137885	0.0083644	Ighm/Cd74/Met/Prdx2/Dab2/App/Bmp2/Igfbp6/Fgf1/Igf1/Gdf15	11
GO:0043409	negative regulation of MAPK cascade	14/813	173/23328	0.00303652	0.0138361	0.0083933	Atf3/Klf4/Errfi1/Apoe/Cav1/Timp3/Dab2/Sfrp1/Fbln1/Sfrp5/Mapk8ip1/Dusp26/Uchl1/Igf1	14
GO:0043409	negative regulation of MAPK cascade	14/807	173/23328	0.0028418	0.012501	0.00751604	Hsph1/Klf4/Apoe/Errfi1/Camk2n1/Uchl1/Dusp26/Mapk8ip1/Cav1/Timp3/Sfrp5/Ndrg2/Sfrp1/Igf1	14
GO:0043518	negative regulation of DNA damage response, signal transduction by p53 class mediator	3/749	16/23328	0.0135083	0.0358522	0.019667	Cd74/Mif/Twist1	3
GO:0030330	DNA damage response, signal transduction by p53 class mediator	6/749	62/23328	0.0143857	0.0378344	0.0207543	Sox4/Cd74/Npm1/Mif/Acer2/Twist1	6
GO:0043516	regulation of DNA damage response, signal transduction by p53 class mediator	4/749	35/23328	0.0250884	0.0599282	0.032874	Cd74/Npm1/Mif/Twist1	4
GO:1902166	negative regulation of intrinsic apoptotic signaling pathway in response to DNA damage by p53 class mediator	2/749	11/23328	0.046729	0.0988866	0.054245	Cd74/Mif	2
GO:1902165	regulation of intrinsic apoptotic signaling pathway in response to DNA damage by p53 class mediator	3/807	15/23328	0.0137494	0.0426527	0.0256443	Mif/Steap3/Cd74	3
GO:0043518	negative regulation of DNA damage response, signal transduction by p53 class mediator	3/807	16/23328	0.0164943	0.0491246	0.0295355	Mif/Cd74/Pcbp4	3
GO:1902253	regulation of intrinsic apoptotic signaling pathway by p53 class mediator	4/807	31/23328	0.0213013	0.0595661	0.0358134	Mif/Steap3/Cd74/Msx1	4
GO:0043516	regulation of DNA damage response, signal transduction by p53 class mediator	4/807	35/23328	0.031828	0.0821954	0.0494189	Npm1/Mif/Cd74/Pcbp4	4
GO:1901796	regulation of signal transduction by p53 class mediator	6/807	71/23328	0.0360762	0.0901817	0.0542206	Npm1/Mif/Steap3/Cd74/Msx1/Pcbp4	6
mmu04668	TNF signaling pathway	16/425	115/9040	8.82546e-05	0.00119774	0.000951115	Il1b/Ptgs2/Fos/Icam1/Jun/CCl2/Cxcl3/Cxcl10/Vcam1/CCl5/Edn1/Cxcl1/Mmp14/CCl12/Creb5/Il6	16
mmu04668	TNF signaling pathway	12/430	115/9040	0.00837278	0.04512	0.0341113	Ptgs2/Mapk3/Vcam1/CCl2/Cxcl10/Fos/Cxcl1/CCl5/Creb3l1/CCl12/Il6/Mapk10	12
mmu04668	TNF signaling pathway	13/418	115/9040	0.00243947	0.0221077	0.0166109	Fos/Cxcl1/Socs3/Mapk3/Vcam1/Cxcl10/CCl2/CCl5/Mapk10/Creb3l1/Edn1/CCl12/Ifnb1	13

## Sheet: TOP10
ID	Description	GeneRatio	BgRatio	pvalue	p.adjust	qvalue	geneID	Count	Group	Enrichment
GO:0030198	extracellular matrix organization	69/749	302/23328	7.06213e-39	2.24812e-35	1.23322e-35	Ctss/Fn1/Mmp19/Spint2/Ltbp3/Spock2/Adamts1/Col4a1/Ramp2/Cav1/Col4a2/Serpinh1/Eln/Ecm2/Ntn4/Tgfb2/Fbln2/Col18a1/Nid1/Npnt/Grem1/Col14a1/Sox9/Smoc2/Col9a2/Mia/Elf3/Meltf/Flrt2/Col11a2/Col11a1/Gpm6b/Tnfrsf11b/Mmp14/Lamb1/Col9a3/Aplp1/Sema5a/Sulf1/Pmp22/Aebp1/Fbln5/Col1a2/Ibsp/Col3a1/Col5a2/MFap4/Mmp2/Lum/Abi3bp/Pdgfra/Scara3/Fap/Lox/CCdc80/Adamts2/Col13a1/Col8a1/Col1a1/Col8a2/Col5a1/Loxl2/Col15a1/My…	69	NOR	BP
GO:0043062	extracellular structure organization	69/749	303/23328	8.87881e-39	2.24812e-35	1.23322e-35	Ctss/Fn1/Mmp19/Spint2/Ltbp3/Spock2/Adamts1/Col4a1/Ramp2/Cav1/Col4a2/Serpinh1/Eln/Ecm2/Ntn4/Tgfb2/Fbln2/Col18a1/Nid1/Npnt/Grem1/Col14a1/Sox9/Smoc2/Col9a2/Mia/Elf3/Meltf/Flrt2/Col11a2/Col11a1/Gpm6b/Tnfrsf11b/Mmp14/Lamb1/Col9a3/Aplp1/Sema5a/Sulf1/Pmp22/Aebp1/Fbln5/Col1a2/Ibsp/Col3a1/Col5a2/MFap4/Mmp2/Lum/Abi3bp/Pdgfra/Scara3/Fap/Lox/CCdc80/Adamts2/Col13a1/Col8a1/Col1a1/Col8a2/Col5a1/Loxl2/Col15a1/My…	69	NOR	BP
GO:0045785	positive regulation of cell adhesion	73/749	435/23328	1.06415e-31	1.79628e-28	9.85363e-29	Spp1/Il1b/Il1a/Icam1/Tnfrsf13c/CCr7/Sdc4/Sox4/H2-Ab1/Il2ra/Myb/Cd74/Il7r/H2-Aa/Cd83/Calr/Hsph1/Hspd1/Fn1/CCr2/S100a10/CCl2/Lgals1/Elane/Vcam1/Cdk6/Angpt1/CCl5/Hes1/Lck/Cd3e/Skap1/Xcl1/Thy1/Cd28/Icos/Gata3/Spock2/Podxl/Cxcl12/Cav1/Ptn/Kdr/Emp2/Cdh13/Ecm2/Plpp3/Tgfb2/Fbln2/Nid1/Tpm1/Npnt/Ifng/Smoc2/Cdh1/Ank3/Igfbp2/Sox2/Enpp2/Ibsp/Abi3bp/CCdc80/Col8a1/Igf1/Vtn/P2ry12/Cd36/Alox15/Il6/Slc4a1/Spta1/Dm…	73	NOR	BP
GO:0031589	cell-substrate adhesion	60/749	351/23328	1.23986e-26	1.56966e-23	8.61047e-24	Spp1/Plau/Sdc4/Calr/Pecam1/Fn1/S100a10/Hpse/Lgals1/Vcam1/Cdk6/Angpt1/Cd34/Cd3e/Skap1/Thy1/Spock2/Ptn/Acer2/Kdr/Bcam/Emp2/Cdh13/Fam107a/Vwf/Gas6/Ecm2/Ntn4/Fbln2/Nid1/Npnt/Grem1/Atp1b2/Smoc2/Sema3e/Mia/Otoa/Meltf/Gpm6b/Itgb8/Apod/Mmp14/Sfrp1/Lamb1/Enpp2/Axl/Col3a1/Abi3bp/CCdc80/Col13a1/Col8a1/Col1a1/Vtn/Serpine1/Cd36/Alox15/Dmtn/Plet1/Col5a3/Postn	60	NOR	BP
GO:0050900	leukocyte migration	56/749	360/23328	7.63726e-23	7.73502e-20	4.2431e-20	Spp1/Il1b/CCl3/CCl4/Stk39/Il1a/Icam1/CCr7/Cd74/S1pr1/Calr/Pecam1/Mif/CCl9/CCr2/Trem2/CCl2/Gpr183/Cxcl3/Cxcl10/Prtn3/Cx3cr1/Elane/Vcam1/Cd34/CCl5/Xcl1/Thy1/Gata3/Flt1/Podxl/Cxcl12/Cd200/Kitl/Ptn/Edn1/Gas6/Ch25h/Cxcl1/Cadm1/Ifng/Grem1/Fut9/Rarres2/F2rl1/Apod/Mmp14/Slc12a2/Ednrb/Nbl1/Aoc3/Serpine1/CCl12/CCl7/P2ry12/Add2	56	NOR	BP
GO:0050673	epithelial cell proliferation	61/749	438/23328	3.17059e-22	2.67598e-19	1.46793e-19	Jun/Plau/Mki67/Igfbp4/Zfp36l1/Npm1/CCnd2/CCl2/Hmox1/Errfi1/Nupr1/Cdk6/Hmga2/Cd34/Gata2/CCnd1/CCl5/Hes1/Gata3/Flt1/Sparc/Cxcl12/Jcad/Cav1/Ptn/Kdr/Nfib/Igfbp3/Cdh13/Tgfb2/Nr1d1/Gja1/Apoe/Nr2f2/Glul/Ifng/Cnmd/Sox9/Cdh1/Fgfr2/F3/Gas1/Gpc3/Vdr/Sfrp1/Sox2/Igfbp5/Sema5a/Sulf1/Ednrb/Fap/Twist1/Serpinf1/Col8a1/Col8a2/Loxl2/Igf1/CCl12/Il6/Aldh1a2/Pax2	61	NOR	BP
GO:0001667	ameboidal-type cell migration	60/749	427/23328	4.46214e-22	3.22804e-19	1.77076e-19	Acta2/Ptgs2/Jun/Akap12/Sdc4/Calr/Pecam1/Hmox1/Klf4/Angpt1/Gata2/Gata3/Bsg/Hspb1/Sparc/Cxcl12/Jcad/Mmrn2/Cdh5/Kitl/Kdr/Sema3g/Ptprg/Emp2/Clec14a/Cdh13/Tns1/Plpp3/Tgfb2/Hbegf/Amotl2/Gja1/Apoe/Nrp2/Nr2f2/Glul/Dnaja4/Ifng/Grem1/Sox9/Smoc2/Sema3e/Sox10/Sema3d/Sema5a/Pmp22/Ednrb/Enpp2/Dcn/Fap/Twist1/Serpinf1/Cygb/Loxl2/Igf1/Timp1/Serpine1/P2ry12/Dmtn/Aqp1	60	NOR	BP
GO:0060326	cell chemotaxis	50/749	303/23328	1.14804e-21	7.26709e-19	3.98641e-19	Spp1/Il1b/CCl3/CCl4/Stk39/CCr7/Cd74/S1pr1/Calr/Mif/CCl9/CCr2/CCl2/Gpr183/Cxcl3/Cxcl10/Cx3cr1/Vcam1/CCl5/Xcl1/Saa3/Flt1/Hspb1/Cxcl12/Ptn/Kdr/Edn1/Gas6/Ackr3/Ch25h/Hbegf/Cxcl1/Ifng/Cxcr6/Grem1/Smoc2/Rarres2/F2rl1/Slc12a2/Sema5a/Lpar1/Ednrb/Enpp2/Nbl1/Pdgfra/Lox/Serpine1/CCr9/CCl12/CCl7	50	NOR	BP
GO:0042060	wound healing	53/749	349/23328	3.47804e-21	1.95697616703808E-18	1.07351e-18	Acta2/Il1a/Plau/Sdc4/Pecam1/Fn1/F13a1/CCr2/CCl2/Hpse/Hmox1/Cfh/Prdx2/Cd34/Gata2/Cav1/Kdr/Vwf/Gas6/Plpp3/Tgfb2/Hbegf/Procr/Mylk/Gja1/Tpm1/Mustn1/Apoe/Serpine2/Cldn4/Smoc2/F3/F2rl1/Slc12a2/Syt11/Axl/Col3a1/Serping1/Pdgfra/Lox/Col1a1/Col5a1/Igf1/Timp1/Serpine1/P2ry12/Cd36/Alox15/Slc4a1/Gata1/Dmtn/Aqp1/Plet1	53	NOR	BP
GO:0042063	gliogenesis	52/749	338/23328	4.57502e-21	2.31679e-18	1.27089e-18	Il1b/CCl3/Sox4/Cnp/Fn1/CCr2/Vcan/Trem2/CCl2/Nrg1/Gpr183/B4galt6/Cx3cr1/Tspan2/Cdk6/Hmga2/Nfix/Hes1/Ptn/Nfib/Plpp3/Tgfb2/Nr1d1/Clu/Mxra8/Serpine2/Ifng/Adgrg6/Atp1b2/Sox9/Sox10/Id4/Lrp2/Mt3/Fa2h/Gpr37l1/Lamb1/Plp1/Efemp1/Ntrk2/Tenm4/Kcnj10/Cdh2/Pmp22/Enpp2/Igf1/Vtn/C1qa/CCl12/P2ry12/Il6/Pax2	52	NOR	BP
GO:0005201	extracellular matrix structural constituent	52/738	148/22669	1.3361e-39	9.98064e-37	7.3415e-37	Fn1/Vcan/Spock2/Igfbp7/Sparc/Col4a1/Mmrn2/Ltbp4/Col4a2/Vwf/Eln/Ntn1/Fbln2/Col18a1/Nid1/Npnt/Col14a1/Ogn/Col9a2/Bgn/Prelp/Col11a2/Col11a1/Lamb1/Col9a3/Efemp1/Fbln5/Col1a2/Dcn/Col3a1/Col5a2/MFap4/Col6a1/Col6a2/Lum/Col12a1/Abi3bp/Lama2/Scara3/Col13a1/Col8a1/Col1a1/Col8a2/Col5a1/Col15a1/Igfbp6/Aspn/Vtn/Col5a3/Spon1/Pcolce2/Postn	52	NOR	MF
GO:0005539	glycosaminoglycan binding	49/738	213/22669	9.37966e-28	3.5033e-25	2.57694e-25	Lipg/Fn1/Vcan/Trem2/CCl2/Cfh/Lrpap1/Cxcl10/Elane/Mpo/Ctsg/Prss57/CCl5/Spock2/Adamts1/Ptn/Ecm2/Hbegf/Fstl1/Apoe/Nrp2/Serpine2/Smoc2/Fgfr2/Bgn/Prelp/Col11a1/Pcolce/Sfrp1/Aplp1/Sema5a/Sulf1/Dcn/Abi3bp/CCdc80/Thbs2/Col13a1/Col5a1/Dpysl3/Fbln7/Pcsk6/Vtn/Lpl/CCl7/Rspo3/Gpnmb/Col5a3/Pcolce2/Postn	49	NOR	MF
GO:0008201	heparin binding	41/738	156/22669	7.89792e-26	1.96658e-23	1.44657e-23	Lipg/Fn1/CCl2/Cfh/Lrpap1/Cxcl10/Elane/Mpo/Ctsg/Prss57/CCl5/Adamts1/Ptn/Ecm2/Hbegf/Fstl1/Apoe/Nrp2/Serpine2/Smoc2/Fgfr2/Prelp/Col11a1/Pcolce/Sfrp1/Aplp1/Abi3bp/CCdc80/Thbs2/Col13a1/Col5a1/Fbln7/Pcsk6/Vtn/Lpl/CCl7/Rspo3/Gpnmb/Col5a3/Pcolce2/Postn	41	NOR	MF
GO:1901681	sulfur compound binding	49/738	260/22669	1.25239e-23	2.33884e-21	1.72039e-21	Lipg/Fn1/CCl2/Cfh/Lrpap1/Gstm1/Cxcl10/Elane/Mpo/Ctsg/Prss57/Cd34/CCl5/Adamts1/Ptn/Ecm2/Hbegf/Fstl1/Apoe/Nrp2/Serpine2/Grem1/Gstm2/Smoc2/Fgfr2/Gsta4/Prelp/Col11a1/Pcolce/Sfrp1/Aplp1/Sema5a/Abi3bp/CCdc80/Thbs2/Col13a1/Col5a1/Dpysl3/Fbln7/Pcsk6/Vtn/Lpl/CCl7/Rspo3/Gpnmb/Col5a3/Gsta2/Pcolce2/Postn	49	NOR	MF
GO:0030020	extracellular matrix structural constituent conferring tensile strength	20/738	38/22669	2.69015e-20	4.01908e-18	2.95633e-18	Col4a1/Col4a2/Col18a1/Col14a1/Col9a2/Col11a2/Col11a1/Col9a3/Col1a2/Col3a1/Col5a2/Col6a1/Col6a2/Col12a1/Col13a1/Col8a1/Col1a1/Col5a1/Col15a1/Col5a3	20	NOR	MF
GO:0050839	cell adhesion molecule binding	44/738	284/22669	6.55065e-18	8.15556e-16	5.99902e-16	Spp1/Il1b/Icam1/Calr/Fn1/Vcam1/Thy1/Bsg/Ptprb/Cxcl12/Esam/Cdh5/Cd200/Ptn/Kdr/Bcam/Emp2/Cdh13/Vwf/Plpp3/Npnt/Cpe/Cadm1/Epcam/Cldn7/Cdh1/Ank3/Itgb8/Mmp14/Nfasc/Lamb1/Tenm4/Cdh2/Fbln5/Ptprd/Ibsp/Col3a1/Cdh11/Fap/Igf1/Nexn/Vtn/Gpnmb/Postn	44	NOR	MF
GO:0019838	growth factor binding	29/738	147/22669	4.74432e-15	4.86358e-13	3.57752e-13	Igfbp4/Il2ra/Rps2/Lifr/Ltbp3/Il2rb/Flt1/Igfbp7/Col4a1/Ptn/Kdr/Ltbp4/Igfbp3/Osmr/Fgfr2/Lrp2/Igfbp2/Ntrk2/Igfbp5/Col1a2/Col3a1/Col6a1/Pdgfra/Htra3/Col1a1/Col5a1/Pcsk6/Igfbp6/Cd36	29	NOR	MF
GO:0005518	collagen binding	21/738	71/22669	5.20865e-15	4.86358e-13	3.57752e-13	Ctss/Sparcl1/Sparc/Serpinh1/Vwf/Ecm2/Nid1/Coch/Pcolce/Aebp1/Dcn/Col6a1/Col6a2/Lum/Abi3bp/Lox/Ctsk/Aspn/Vtn/Map1a/Pcolce2	21	NOR	MF
GO:0050840	extracellular matrix binding	18/738	61/22669	4.86412e-13	4.03722e-11	2.96968e-11	Spp1/Ctss/Ncl/Lgals1/Spock2/Sparcl1/Sparc/Bcam/Clec14a/Eln/Ntn4/Fbln2/Nid1/Adgrg6/Smoc2/Bgn/Dcn/Vtn	18	NOR	MF
GO:0043394	proteoglycan binding	14/738	38/22669	6.23378e-12	4.65664e-10	3.4253e-10	Ctss/Fn1/Hpse/Cfh/Ptn/Nid1/Apoe/Grem1/Sema5a/Ctsk/Col5a1/Lpl/Gpnmb/Col5a3	14	NOR	MF
GO:0062023	collagen-containing extracellular matrix	100/752	385/23271	9.09666e-62	3.98434e-59	2.8056e-59	Fcnb/Calr/Fn1/F13a1/Vcan/S100a10/Ctsc/Lgals1/Gsto1/Elane/Angpt1/Ltbp3/Serpinb9/Spock2/Igfbp7/Sparcl1/Timp3/Sparc/Adamts1/Col4a1/Mmrn2/Ptn/Ltbp4/Col4a2/Clec14a/Serpinh1/Vwf/Plxna2/Eln/Ecm2/Ntn4/Ntn1/Tgfb2/Fbln2/Col18a1/Mgp/Nid1/Itih5/Npnt/Serpine2/Sod3/Col14a1/Ogn/Smoc2/Col9a2/Fgfr2/Rarres2/F3/Bgn/Coch/Prelp/Col11a2/Col11a1/Gpc3/Sfrp1/Lamb1/Col9a3/Efemp1/Pmp22/Fbln5/Col1a2/Dcn/Col3a1/Serping1/Col5…	100	NOR	CC
GO:0005581	collagen trimer	32/752	81/23271	8.496e-27	1.86062e-24	1.31017e-24	Fcnb/Msr1/Col4a1/Col4a2/Cthrc1/Col18a1/Col14a1/Col9a2/Col11a2/Col11a1/Col9a3/Col1a2/Dcn/Col3a1/Col5a2/Col6a1/Col6a2/Lum/Col12a1/Colec12/Scara3/Lox/Col13a1/Col8a1/Col1a1/Col8a2/Col5a1/Col15a1/C1qc/C1qb/C1qa/Col5a3	32	NOR	CC
GO:0045121	membrane raft	57/752	379/23271	2.34037e-22	2.92534e-20	2.0599e-20	Ptgs2/Icam1/Cd79a/Ms4a1/Sdc4/Atp1b1/Pecam1/Hspd1/S100a10/Hpse/Hmox1/Atp1a1/Prtn3/Angpt1/Lck/Skap1/Thy1/Cd8a/Cd28/Rgs16/Bsg/Cav1/Cavin1/Cavin2/Abcg2/Mal/Kdr/Emp2/Cdh13/Serpinh1/Plpp3/Hspa1a/Gja1/Slc2a1/Cpe/Cdh1/Fxyd1/Arc/Gpm6b/Lrp2/Kcnq1/Ldhb/Vdr/Cntn1/Mme/Mapt/Cdh2/Sulf1/Atp1a2/Ednrb/Ptgis/Ano1/P2ry12/Cd36/Fcer1a/Add2/Aqp1	57	NOR	CC
GO:0098857	membrane microdomain	57/752	380/23271	2.67154e-22	2.92534e-20	2.0599e-20	Ptgs2/Icam1/Cd79a/Ms4a1/Sdc4/Atp1b1/Pecam1/Hspd1/S100a10/Hpse/Hmox1/Atp1a1/Prtn3/Angpt1/Lck/Skap1/Thy1/Cd8a/Cd28/Rgs16/Bsg/Cav1/Cavin1/Cavin2/Abcg2/Mal/Kdr/Emp2/Cdh13/Serpinh1/Plpp3/Hspa1a/Gja1/Slc2a1/Cpe/Cdh1/Fxyd1/Arc/Gpm6b/Lrp2/Kcnq1/Ldhb/Vdr/Cntn1/Mme/Mapt/Cdh2/Sulf1/Atp1a2/Ednrb/Ptgis/Ano1/P2ry12/Cd36/Fcer1a/Add2/Aqp1	57	NOR	CC
GO:0098589	membrane region	57/752	393/23271	1.43229e-21	1.25468e-19	8.83496e-20	Ptgs2/Icam1/Cd79a/Ms4a1/Sdc4/Atp1b1/Pecam1/Hspd1/S100a10/Hpse/Hmox1/Atp1a1/Prtn3/Angpt1/Lck/Skap1/Thy1/Cd8a/Cd28/Rgs16/Bsg/Cav1/Cavin1/Cavin2/Abcg2/Mal/Kdr/Emp2/Cdh13/Serpinh1/Plpp3/Hspa1a/Gja1/Slc2a1/Cpe/Cdh1/Fxyd1/Arc/Gpm6b/Lrp2/Kcnq1/Ldhb/Vdr/Cntn1/Mme/Mapt/Cdh2/Sulf1/Atp1a2/Ednrb/Ptgis/Ano1/P2ry12/Cd36/Fcer1a/Add2/Aqp1	57	NOR	CC
GO:0005604	basement membrane	31/752	114/23271	2.09802e-20	1.53156e-18	1.07846e-18	Fn1/Gsto1/Timp3/Sparc/Adamts1/Col4a1/Mmrn2/Ptn/Col4a2/Ntn4/Ntn1/Tgfb2/Col18a1/Nid1/Npnt/Smoc2/Lamb1/Col9a3/Efemp1/Pmp22/Lama2/CCdc80/Thbs2/Serpinf1/Col8a1/Col8a2/Col5a1/Loxl2/Col15a1/Timp1/Vtn	31	NOR	CC
GO:0045177	apical part of cell	50/752	454/23271	4.10123e-14	2.5662e-12	1.80701e-12	Spp1/Stk39/Atp1b1/Fn1/Atp1a1/Vcam1/Cd34/Muc13/Car2/Slc7a8/Thy1/Adgrf5/Abcb1a/Podxl/Cav1/Abcg2/Mal/Slc9a3r2/Emp2/Plat/Slc22a8/Osmr/Slc16a2/Hspa1a/Amotl2/Gja1/Slc2a1/Epcam/Cldn4/Atp1b2/Enpep/Cdh1/Fxyd1/Otoa/Lrp2/Igfbp2/Slc12a2/Kcna1/Kcnj10/Cdh2/Fap/Cntfr/Pth1r/Ano1/Cd36/Aqp1/Kcne1/Plet1/Gjb6/Aqp5	50	NOR	CC
GO:0016324	apical plasma membrane	42/752	350/23271	2.66532e-13	1.45926e-11	1.02755e-11	Stk39/Atp1b1/Fn1/Atp1a1/Cd34/Muc13/Slc7a8/Thy1/Abcb1a/Podxl/Cav1/Abcg2/Mal/Slc9a3r2/Emp2/Slc22a8/Osmr/Slc16a2/Hspa1a/Amotl2/Gja1/Slc2a1/Epcam/Cldn4/Atp1b2/Enpep/Fxyd1/Otoa/Lrp2/Igfbp2/Slc12a2/Kcna1/Kcnj10/Cdh2/Cntfr/Pth1r/Ano1/Aqp1/Kcne1/Plet1/Gjb6/Aqp5	42	NOR	CC
GO:0043209	myelin sheath	32/752	213/23271	4.38937e-13	2.13616e-11	1.50419e-11	Gsn/Atp1b1/Cnp/Hspd1/Mif/Ass1/Gsto1/Gstm1/Atp1a1/Prdx2/Tspan2/Car2/Thy1/Mbp/Cldn5/Glul/Ehd3/Cryab/Cdh1/Tubb4a/Ldhb/Cntn1/Nfasc/Gjc3/Mpz/Plp1/Gnao1/Ckb/Pmp22/Atp1a2/Cldn11/Hba-a1	32	NOR	CC
GO:0044853	plasma membrane raft	24/752	130/23271	4.20917e-12	1.84362e-10	1.2982e-10	Ptgs2/Ms4a1/Atp1b1/Hmox1/Atp1a1/Prtn3/Skap1/Cd8a/Cav1/Cavin1/Cavin2/Mal/Cdh13/Slc2a1/Cdh1/Fxyd1/Vdr/Cdh2/Atp1a2/Ptgis/P2ry12/Cd36/Add2/Aqp1	24	NOR	CC
mmu04974	Protein digestion and absorption	31/425	108/9040	9.29564e-17	2.64926e-14	2.10375e-14	Atp1b1/Atp1a1/Slc7a8/Col4a1/Col4a2/Eln/Col18a1/Atp1b2/Col14a1/Col9a2/Col11a2/Col11a1/Kcnq1/Mme/Col9a3/Atp1a2/Col1a2/Col3a1/Col5a2/Col6a1/Col6a2/Col12a1/Col13a1/Col8a1/Col1a1/Col8a2/Col5a1/Col15a1/Cpa3/Col5a3/Kcnj13	31	NOR	KEGG
mmu05144	Malaria	19/425	57/9040	4.85561e-12	6.91924e-10	5.4945e-10	Il1b/Icam1/Pecam1/CCl2/Vcam1/Tgfb2/Ifng/Klra4/Sdc2/Thbs2/CCl12/Cd36/Il6/Hbb-bt/Hba-a2/Gypa/Hbb-bs/Ackr1/Hba-a1	19	NOR	KEGG
mmu04514	Cell adhesion molecules	33/425	182/9040	1.41138e-11	1.34081e-09	1.06472e-09	Icam1/Sdc4/H2-Ab1/H2-Eb1/H2-Aa/Pecam1/Vcan/Sdc3/Vcam1/Cd34/Cd8a/Cd28/Icos/Cldn5/Esam/Cdh5/Cadm1/Cldn4/Sdc2/Cldn9/Cldn8/Cldn7/Cldn23/Cdh1/Itgb8/Cntn1/Nfasc/Mpz/Cdh2/Ptprd/Cldn11/Cldn13/Cldn10	33	NOR	KEGG
mmu05323	Rheumatoid arthritis	22/425	87/9040	4.81677e-11	3.43195e-09	2.72528e-09	Il1b/CCl3/Il1a/Fos/Icam1/Jun/H2-Ab1/H2-Eb1/H2-Aa/CCl2/Cxcl3/Angpt1/CCl5/Cd28/Flt1/Cxcl12/Tgfb2/Cxcl1/Ifng/Ctsk/CCl12/Il6	22	NOR	KEGG
mmu05418	Fluid shear stress and atherosclerosis	27/425	147/9040	7.97723e-10	4.54702e-08	3.61074e-08	Il1b/Il1a/Fos/Icam1/Jun/Sdc4/Pecam1/CCl2/Ass1/Hmox1/Gsto1/Gstm1/Mgst3/Vcam1/Cav1/Cdh5/Kdr/Edn1/Plat/Ifng/Sdc2/Gstm2/Gsta4/Calml4/Mmp2/CCl12/Gsta2	27	NOR	KEGG
mmu04512	ECM-receptor interaction	20/425	88/9040	2.8424e-09	1.35014e-07	1.07213e-07	Spp1/Sdc4/Fn1/Col4a1/Col4a2/Vwf/Npnt/Col9a2/Itgb8/Lamb1/Col9a3/Col1a2/Ibsp/Col6a1/Col6a2/Lama2/Thbs2/Col1a1/Vtn/Cd36	20	NOR	KEGG
mmu04933	AGE-RAGE signaling pathway in diabetic complications	21/425	101/9040	6.33009e-09	2.57725e-07	2.04657e-07	Il1b/Il1a/Egr1/Icam1/Jun/Fn1/CCl2/Vcam1/CCnd1/Col4a1/Edn1/Col4a2/Tgfb2/F3/Col1a2/Col3a1/Mmp2/Col1a1/Serpine1/CCl12/Il6	21	NOR	KEGG
mmu04640	Hematopoietic cell lineage	20/425	94/9040	9.61362e-09	3.42485e-07	2.71964e-07	Il1b/Il1a/Ms4a1/H2-Ab1/Il2ra/Il7r/H2-Eb1/H2-Aa/Cd34/Cd3e/Cd3g/Cd8a/Cd7/Kitl/Cd59a/Mme/Siglech/Cd36/Il6/Gypa	20	NOR	KEGG
mmu04061	Viral protein interaction with cytokine and cytokine receptor	20/425	95/9040	1.1657e-08	3.6914e-07	2.9313e-07	CCl3/CCl4/CCr7/Il2ra/CCl9/CCr2/CCl2/Cxcl3/Cxcl10/Cx3cr1/CCl5/Il2rb/Xcl1/Cxcl12/Ackr3/Cxcl1/CCr9/CCl12/CCl7/Il6	20	NOR	KEGG
mmu04510	Focal adhesion	29/425	203/9040	7.13958e-08	2.03478e-06	1.6158e-06	Spp1/Jun/CCnd2/Fn1/Emp1/CCnd1/Flt1/Col4a1/Cav1/Kdr/Col4a2/Emp2/Vwf/Mylk/Col9a2/Itgb8/Lamb1/Col9a3/Col1a2/Ibsp/Col6a1/Col6a2/Pdgfra/Lama2/Thbs2/Col1a1/Igf1/Myl9/Vtn	29	NOR	KEGG
GO:0042060	wound healing	54/813	349/23328	2.5492e-20	1.27307e-16	7.72274e-17	Il1a/Acta2/Hmox1/Anxa6/Sdc4/Prkce/Pecam1/Gnas/Fn1/F13a1/CCl2/Cfh/Hpse/Anxa5/Apoe/Stxbp1/Cd34/Slc4a1/Aqp1/Dmtn/Gata1/Tspan8/Cd36/Prdx2/Col5a1/Tpm1/Cav1/Kdr/Vwf/Procr/Gata2/Plpp3/Cd151/Hbegf/Mylk/Slc12a2/Serpine2/Serping1/Pdgfra/Col3a1/Fbln1/Lox/Axl/F3/Rab3a/Col1a1/Cldn4/P2ry12/Serpine1/Syt11/Fgf1/Mustn1/Tmeff2/Igf1	54	GEN	BP
GO:0009611	response to wounding	64/813	492/23328	8.3688e-20	2.08969e-16	1.26765e-16	Il1a/Acta2/Hmox1/Anxa6/Sdc4/Prkce/Pecam1/Gnas/Fn1/F13a1/CCl2/Cfh/Klf4/Hpse/Anxa5/Apoe/Stxbp1/Fkbp1b/Cd34/Slc4a1/Aqp1/Dmtn/Gata1/Tspan8/Cd36/Prdx2/Col5a1/Tpm1/Cav1/Kdr/Vwf/Procr/Ptn/Gata2/Plpp3/Cd151/Hbegf/Mylk/Slc12a2/Serpine2/Serping1/Mmp2/Pdgfra/Col3a1/Fbln1/Lox/Dpysl3/Slc1a3/Mdk/Axl/F3/Rab3a/Col1a1/Cldn4/P2ry12/Serpine1/Syt11/Fgf1/Mag/Mustn1/Il6/Nol3/Tmeff2/Igf1	64	GEN	BP
GO:0007409	axonogenesis	63/813	482/23328	1.28488e-19	2.13889e-16	1.2975e-16	Gdi1/L1cam/Tubb2b/Cnp/Fn1/Olfm1/Apoe/Thy1/Dpysl2/Stxbp1/Atp5g1/Kel/Ache/Bsg/Cxcl12/Sema3g/Sema3c/Nrp2/Ntn1/Scn1b/App/Enah/Gas1/Cdh11/Cdh2/Etv1/Ndn/Map1b/Pmp22/Dclk1/Rab3a/Alcam/Wnt3/Lrp2/Ank3/Map2/Atl1/Nfasc/Ntrk2/Mapt/Mag/Notch3/Map1a/Chn1/Fgf13/Kif5c/Snap91/Grin1/Crmp1/Pak3/Vstm2l/Ctnna2/Apbb1/Epha5/Uchl1/Nefm/Kif5a/Map6/Tubb3/Rufy3/Cntn2/Efnb3/Brsk1	63	GEN	BP
GO:0043270	positive regulation of ion transport	50/813	334/23328	2.79957e-18	3.49526e-15	2.12031e-15	Il1a/CCl4/Atp1b1/Gnas/Slc25a4/Ctss/CCl2/Apoe/Cxcl10/Cxcl1/CCl5/Xcl1/Thy1/Ehd3/Dpysl2/Stxbp1/Trem2/Snca/Abcb1a/Cxcl12/Cav1/Slc9a3r2/Tcaf1/Mylk/Scn1b/Slc12a2/S100a1/Fxyd1/Atp1b2/Ank2/Fhl1/Cacnb3/Arc/Ank3/CCl12/P2ry12/Serpine1/Plp1/Kcna1/Syt4/Akap6/Syt1/Dpp6/Grin1/Rgs7/Gal/Cntn1/Kcne1/Kcnq1/Fabp3	50	GEN	BP
GO:0030198	extracellular matrix organization	47/813	302/23328	6.0711e-18	5.78702e-15	3.51054e-15	Fn1/Ctss/Col5a1/Spock2/Cav1/Col4a1/Ramp2/Adamts1/Serpinh1/Eln/Fbln2/Fbln5/App/Sox9/Lum/Mmp2/Aebp1/Pdgfra/Col8a2/Cyp1b1/Abi3bp/Fap/Scara3/Col3a1/Col5a2/Col8a1/Fbln1/Lox/Col11a1/Col1a2/Gpm6b/Pmp22/Creb3l1/Col1a1/Col14a1/Mia/Grem1/Col2a1/Col9a3/Col11a2/Myh11/Vtn/Il6/Aplp1/Apbb1/Smpd3/Gas2	47	GEN	BP
GO:0043062	extracellular structure organization	47/813	303/23328	6.95276e-18	5.78702e-15	3.51054e-15	Fn1/Ctss/Col5a1/Spock2/Cav1/Col4a1/Ramp2/Adamts1/Serpinh1/Eln/Fbln2/Fbln5/App/Sox9/Lum/Mmp2/Aebp1/Pdgfra/Col8a2/Cyp1b1/Abi3bp/Fap/Scara3/Col3a1/Col5a2/Col8a1/Fbln1/Lox/Col11a1/Col1a2/Gpm6b/Pmp22/Creb3l1/Col1a1/Col14a1/Mia/Grem1/Col2a1/Col9a3/Col11a2/Myh11/Vtn/Il6/Aplp1/Apbb1/Smpd3/Gas2	47	GEN	BP
GO:0010959	regulation of metal ion transport	56/813	427/23328	1.26049e-17	8.99267e-15	5.45516e-15	Ptgs2/CCl4/Ywhah/Atp1b1/Prkce/Gnas/Vamp2/Atp1a1/Fkbp1a/Cxcl10/Cxcl1/CCl5/Xcl1/Thy1/Ehd3/Fkbp1b/Trem2/Kel/Snca/Cxcl12/Cav1/Ace/Mylk/Scn1b/Serpine2/S100a1/Fxyd1/Fxyd3/Atp1b2/Gnao1/Ank2/Fhl1/Atp1a2/Cacnb3/Ank3/CCl12/P2ry12/Serpine1/Plp1/Kcna1/Fxyd6/Rgs4/Pln/Kcnab1/Akap6/Fgf13/Dpp6/Grin1/Rgs7/Gal/Cntn1/Nol3/Jph4/Kcne1/Kcnq1/Igf1	56	GEN	BP
GO:0099003	vesicle-mediated transport in synapse	42/813	260/23328	9.13927e-17	5.70519e-14	3.4609e-14	Prkce/Vamp2/Stxbp1/Apba1/Snca/Pls3/Clstn1/Dnm3/Slc18a2/Cdh2/Pfn2/Snap47/Rab3a/Pacsin1/Arc/Prkar1b/Vamp1/Sncg/Syt11/Syt4/Snap25/Syt1/Sv2a/Sh3gl2/Pclo/Snap91/Mapk10/Cadps/Syt5/Syn2/Nrxn1/Nrxn3/Syp/Sncb/Slc17a6/Syn1/Amph/Dnm1/Napb/Sh3gl3/Brsk1/Stx1b	42	GEN	BP
GO:0099504	synaptic vesicle cycle	39/813	231/23328	2.5109e-16	1.39327e-13	8.45189e-14	Prkce/Vamp2/Stxbp1/Apba1/Snca/Pls3/Dnm3/Slc18a2/Cdh2/Pfn2/Snap47/Rab3a/Pacsin1/Prkar1b/Vamp1/Sncg/Syt11/Syt4/Snap25/Syt1/Sv2a/Sh3gl2/Pclo/Snap91/Cadps/Syt5/Syn2/Nrxn1/Nrxn3/Syp/Sncb/Slc17a6/Syn1/Amph/Dnm1/Napb/Sh3gl3/Brsk1/Stx1b	39	GEN	BP
GO:0010769	regulation of cell morphogenesis involved in differentiation	48/813	351/23328	5.33684e-16	2.50019e-13	1.51667e-13	Gdi1/L1cam/Olfm4/Ywhah/Tubb2b/S100a10/Fn1/Olfm1/Met/Apoe/Thy1/Dpysl2/Atp5g1/Dmtn/Kel/Ache/Cxcl12/Sema3g/Sema3c/Dab2/Dnm3/Ntn1/Cdh2/Sdc2/Fbln1/Ptprd/Mdk/Map1b/Stau2/Enpp2/Arc/Wnt3/Map2/Kif1a/Ntrk2/Mapt/Mag/Chn1/Fgf13/Snap91/Grin1/Pak3/Nefm/Map6/Rufy3/Cntn2/Efnb3/Brsk1	48	GEN	BP
GO:0062023	collagen-containing extracellular matrix	78/822	385/23271	6.61794e-37	3.49427e-34	2.11078e-34	Anxa6/Timp2/Fcnb/S100a10/Fn1/F13a1/Ctsb/Lgals1/Anxa5/Cst3/Elane/Ache/Col5a1/Spock2/Igfbp7/Sparc/Sparcl1/Col4a1/Timp3/Mmrn2/Adamts1/Ltbp4/Sema3c/Vwf/Serpinh1/Eln/Ptn/Fbln2/Cd151/Fbln5/Mgp/Ntn1/Serpinb6a/Itih5/Serpine2/Dcn/Serping1/Col6a1/Col6a2/Lum/Itih2/Col8a2/Abi3bp/Prelp/Col12a1/Col3a1/Col5a2/Sfrp1/Col8a1/Efemp1/Fbln1/Bgn/Lox/Sod3/Col11a1/Bmp1/Serpinf1/Ogn/Col1a2/Rarres2/Pmp22/Gpc3/F3/Col1a1/Co…	78	GEN	CC
GO:0043209	myelin sheath	57/822	213/23271	4.92262e-34	1.29957e-31	7.85028e-32	Gdi1/Atp6v1b2/Aldoa/Atp1b1/Cnp/Calm2/Atp5o/Slc25a4/Tuba1b/Tubb4b/Vdac1/Cox6a1/Ass1/Gstm1/Atp1a1/Ywhag/Thy1/Ehd3/Mdh1/Dpysl2/Stxbp1/Nsf/Car2/Prdx2/Hba-a1/Cldn5/Tuba1a/Cryab/Ckb/Ldhb/Gnao1/Pmp22/Eno2/Atp1a2/Pacsin1/Mpz/Plp1/Nfasc/Mag/Mbp/Tubb4a/Snap25/Eef1a2/Syn2/Tagln3/Cntn1/Ckmt1/Syn1/Dnm1/Napb/Uchl1/Nefm/Cldn11/Mobp/Ermn/Cntn2/Mog	57	GEN	CC
GO:0150034	distal axon	63/822	384/23271	1.24321e-24	2.18806e-22	1.32173e-22	Timp2/L1cam/Blvrb/Calm2/CCl2/Olfm1/Anxa5/Fkbp1a/Thy1/Dpysl2/Atp5g1/Aqp1/Snca/Stmn2/App/Clu/Klc1/Dctn2/Slc18a2/Dpysl3/Gpm6a/Pfn2/Map1b/Eno2/Rab3a/Pacsin1/Lrp2/Map2/Kcna1/Sncg/Syt11/Ntrk2/Mapt/Tmod2/Fez1/Mapk8ip1/Fgf13/Snap25/Ptprn/Gria2/Pclo/Kif5c/Nrsn1/Snap91/Grin1/Crmp1/Cdk5r2/Kcnk2/Nrxn1/Syp/Sncb/Apbb1/Amph/Elavl4/Kif5a/Penk/Kif3c/Cpeb1/Tubb3/Rufy3/Kcna6/Brsk1/Calca	63	GEN	CC
GO:0045121	membrane raft	59/822	379/23271	6.00799e-22	7.26535e-20	4.38876e-20	Ptgs2/Hmox1/L1cam/Mapk3/Atp1b1/Sdc4/Pecam1/S100a10/Gnas/Slc25a4/Hpse/Ctsb/Atp1a1/Hspa1a/Thy1/Rgs16/Prtn3/Prkar2a/Aqp1/Add2/Cd36/Bsg/Cav1/Kdr/Cavin2/Cavin1/Serpinh1/Cdh13/Mal/Plvap/Plpp3/Ptgis/App/Tuba1a/Fxyd1/Mme/Cdh2/Cpe/Gpm6b/Ldhb/Eno2/Atp1a2/Clip3/Ms4a1/Cd8a/Arc/Lrp2/P2ry12/Ednrb/Mapt/Gnai1/Akap6/Snap25/Rit2/Rgs7/Cntn1/Faim2/Mog/Kcnq1	59	GEN	CC
GO:0098857	membrane microdomain	59/822	380/23271	6.88007e-22	7.26535e-20	4.38876e-20	Ptgs2/Hmox1/L1cam/Mapk3/Atp1b1/Sdc4/Pecam1/S100a10/Gnas/Slc25a4/Hpse/Ctsb/Atp1a1/Hspa1a/Thy1/Rgs16/Prtn3/Prkar2a/Aqp1/Add2/Cd36/Bsg/Cav1/Kdr/Cavin2/Cavin1/Serpinh1/Cdh13/Mal/Plvap/Plpp3/Ptgis/App/Tuba1a/Fxyd1/Mme/Cdh2/Cpe/Gpm6b/Ldhb/Eno2/Atp1a2/Clip3/Ms4a1/Cd8a/Arc/Lrp2/P2ry12/Ednrb/Mapt/Gnai1/Akap6/Snap25/Rit2/Rgs7/Cntn1/Faim2/Mog/Kcnq1	59	GEN	CC
GO:0098589	membrane region	59/822	393/23271	3.83837e-21	3.37777e-19	2.0404e-19	Ptgs2/Hmox1/L1cam/Mapk3/Atp1b1/Sdc4/Pecam1/S100a10/Gnas/Slc25a4/Hpse/Ctsb/Atp1a1/Hspa1a/Thy1/Rgs16/Prtn3/Prkar2a/Aqp1/Add2/Cd36/Bsg/Cav1/Kdr/Cavin2/Cavin1/Serpinh1/Cdh13/Mal/Plvap/Plpp3/Ptgis/App/Tuba1a/Fxyd1/Mme/Cdh2/Cpe/Gpm6b/Ldhb/Eno2/Atp1a2/Clip3/Ms4a1/Cd8a/Arc/Lrp2/P2ry12/Ednrb/Mapt/Gnai1/Akap6/Snap25/Rit2/Rgs7/Cntn1/Faim2/Mog/Kcnq1	59	GEN	CC
GO:0030426	growth cone	41/822	209/23271	2.40721e-19	1.81572e-17	1.09682e-17	Timp2/L1cam/Calm2/Olfm1/Thy1/Dpysl2/Snca/Stmn2/App/Clu/Klc1/Dctn2/Dpysl3/Gpm6a/Map1b/Eno2/Lrp2/Map2/Ntrk2/Mapt/Tmod2/Fez1/Mapk8ip1/Fgf13/Snap25/Gria2/Pclo/Kif5c/Nrsn1/Grin1/Crmp1/Cdk5r2/Nrxn1/Sncb/Apbb1/Elavl4/Kif5a/Kif3c/Cpeb1/Tubb3/Rufy3	41	GEN	CC
GO:0030427	site of polarized growth	41/822	216/23271	8.50641e-19	5.61423e-17	3.39137e-17	Timp2/L1cam/Calm2/Olfm1/Thy1/Dpysl2/Snca/Stmn2/App/Clu/Klc1/Dctn2/Dpysl3/Gpm6a/Map1b/Eno2/Lrp2/Map2/Ntrk2/Mapt/Tmod2/Fez1/Mapk8ip1/Fgf13/Snap25/Gria2/Pclo/Kif5c/Nrsn1/Grin1/Crmp1/Cdk5r2/Nrxn1/Sncb/Apbb1/Elavl4/Kif5a/Kif3c/Cpeb1/Tubb3/Rufy3	41	GEN	CC
GO:0005581	collagen trimer	25/822	81/23271	2.8353e-17	1.66337e-15	1.00479e-15	Fcnb/Col5a1/Col4a1/Dcn/Col6a1/Col6a2/Lum/Col8a2/Col12a1/Scara3/Col3a1/Col5a2/Col8a1/Lox/Col11a1/Col1a2/Col1a1/Col14a1/Col2a1/Col9a3/Col11a2/C1qc/C1qb/C1qa/Gldn	25	GEN	CC
GO:0098984	neuron to neuron synapse	56/822	433/23271	4.33302e-17	2.28783e-15	1.38201e-15	Cnn3/Met/Atp1a1/Fabp5/Dnajb1/Dynll2/Nrgn/Nsf/Dmtn/Add2/Hspb1/Clstn1/Dnm3/Cald1/Map4/Cadm1/Cdh2/Ptprd/Cryab/Atp1b2/Map1b/Ank2/Dclk1/Snap47/Pacsin1/Arc/Zdhhc2/Map2/Prkar1b/Syt11/Ntrk2/Mapt/Rgs7bp/Map1a/Syt1/Gria2/Sh3gl2/Pclo/Mapk8ip2/Snap91/Mapk10/Grin1/Gng3/Pak3/Syn2/Syp/Ctnna2/Syn1/Dnm1/Cnih2/Nefm/Penk/Epb41l3/Cpeb1/Efnb3/Sh3gl3	56	GEN	CC
GO:0005201	extracellular matrix structural constituent	39/801	148/22669	2.19872e-23	1.76557e-20	1.22897e-20	Fn1/Col5a1/Spock2/Igfbp7/Sparc/Col4a1/Mmrn2/Ltbp4/Vwf/Eln/Fbln2/Fbln5/Ntn1/Dcn/Col6a1/Col6a2/Lum/Col8a2/Abi3bp/Prelp/Col12a1/Scara3/Col3a1/Col5a2/Col8a1/Efemp1/Fbln1/Bgn/Col11a1/Ogn/Col1a2/Col1a1/Col14a1/Col2a1/Col9a3/Col11a2/Igfbp6/Vtn/Pcolce2	39	GEN	MF
GO:0005539	glycosaminoglycan binding	40/801	213/22669	3.36157e-18	1.34967e-15	9.39471e-16	Anxa6/Lpl/Fn1/CCl2/Cfh/Lrpap1/Apoe/Cxcl10/CCl5/Trem2/Ctsg/Mpo/Elane/Col5a1/Spock2/Adamts1/Ptn/Hbegf/Nrp2/App/Fstl1/Serpine2/Dcn/Abi3bp/Prelp/Pcolce/Sfrp1/Bgn/Col11a1/Dpysl3/Mdk/Jchain/CCl7/Fgf1/Vtn/Pcsk6/Aplp1/Spock3/Pcolce2/Rspo3	40	GEN	MF
GO:0008201	heparin binding	32/801	156/22669	5.62202e-16	1.43297e-13	9.9745e-14	Lpl/Fn1/CCl2/Cfh/Lrpap1/Apoe/Cxcl10/CCl5/Ctsg/Mpo/Elane/Col5a1/Adamts1/Ptn/Hbegf/Nrp2/App/Fstl1/Serpine2/Abi3bp/Prelp/Pcolce/Sfrp1/Col11a1/Mdk/CCl7/Fgf1/Vtn/Pcsk6/Aplp1/Pcolce2/Rspo3	32	GEN	MF
GO:0050839	cell adhesion molecule binding	43/801	284/22669	7.13806e-16	1.43297e-13	9.9745e-14	Timp2/L1cam/Olfm4/Vcam1/Fn1/Thy1/Tspan8/Bsg/Ptprb/Cxcl12/Kdr/Bcam/Cd200/Vwf/Cdh13/Ptn/Dab2/Plpp3/Cd151/Fbln5/App/Cadm1/Fap/Cdh11/Col3a1/Cdh2/Cpe/Fbln1/Ptprd/Itgb8/Spp1/Epcam/Cldn7/Ank3/Gldn/Nfasc/Fgf1/Vtn/Nrxn1/Vstm2l/Ctnna2/Nrxn2/Igf1	43	GEN	MF
GO:1901681	sulfur compound binding	40/801	260/22669	4.27904e-15	6.87214e-13	4.78352e-13	Anxa6/Lpl/Fn1/CCl2/Cfh/Gstm1/Lrpap1/Apoe/Cxcl10/CCl5/Ctsg/Cd34/Acot7/Mpo/Elane/Col5a1/Adamts1/Ptn/Hbegf/Nrp2/App/Fstl1/Serpine2/Abi3bp/Prelp/Pcolce/Gsta4/Sfrp1/Gstm2/Col11a1/Dpysl3/Mdk/Grem1/CCl7/Fgf1/Vtn/Pcsk6/Aplp1/Pcolce2/Rspo3	40	GEN	MF
GO:0030020	extracellular matrix structural constituent conferring tensile strength	15/801	38/22669	1.06488e-12	1.42516e-10	9.9202e-11	Col5a1/Col4a1/Col6a1/Col6a2/Col12a1/Col3a1/Col5a2/Col8a1/Col11a1/Col1a2/Col1a1/Col14a1/Col2a1/Col9a3/Col11a2	15	GEN	MF
GO:0005518	collagen binding	19/801	71/22669	3.2461e-12	3.72374e-10	2.592e-10	Ctss/Ctsb/Ache/Sparc/Sparcl1/Vwf/Serpinh1/Dcn/Col6a1/Col6a2/Lum/Aebp1/Abi3bp/Pcolce/Lox/Coch/Vtn/Map1a/Pcolce2	19	GEN	MF
GO:0015631	tubulin binding	43/801	366/22669	5.46865e-12	5.48916e-10	3.82086e-10	Gnas/Cnn3/Dpysl2/Snca/Stmn2/Dnm3/CCser2/Map4/Klc1/Kif1b/Map1lc3a/Gjb6/Cryab/Ndn/Map1b/Kif21a/Mapre3/Clip3/Reep1/Tppp3/Map2/Kif1a/Sncg/Syt11/Mapt/Fez1/Ncald/Ttll7/Map1a/Fgf13/Kif5c/Stmn3/Sybu/Mast1/Sncb/Dnm1/Reep2/Kif5a/Map6/Kif3c/Stmn4/Brsk1/Gas2	43	GEN	MF
GO:0003779	actin binding	45/801	434/22669	1.21049e-10	1.08003e-08	7.51779e-09	Anxa6/Ywhah/Tmsb10/Prkce/Cnn3/Rusc1/Slc4a1/Spta1/Sptb/Dmtn/Snca/Add2/Tmod1/Tpm1/Pls3/Ace/Mylk/Cald1/Parva/Enah/Cfl2/Gjb6/Pfn2/Map1b/Arc/Map2/Spire2/Tmod2/Ncald/Tagln/Myh11/Tpm2/Lmod1/Map1a/Cdk5r2/Tagln3/Ctnna2/Phactr1/Coro2b/Epb41l3/Mobp/Ermn/Phactr3/Gas2/Dnase1	45	GEN	MF
GO:0001664	G protein-coupled receptor binding	36/801	310/22669	4.11339e-10	3.16158e-08	2.20069e-08	CCl4/Fcnb/Gnas/Calm2/CCl9/CCl2/Hspa1a/Cxcl10/Cxcl1/CCl5/Xcl1/Prkar2a/Nsf/Tac2/Cxcl12/Ace/Dnm3/App/Sfrp1/Ppp1r1b/Gnao1/Reep1/Wnt3/CCl12/CCl7/Ednrb/Gnai1/Cxcl14/Aplp1/Gal/Dnm1/Reep2/Uchl1/Penk/Rspo3/Calca	36	GEN	MF
mmu04514	Cell adhesion molecules	35/430	182/9040	7.74257e-13	2.25309e-10	1.70337e-10	L1cam/Sdc4/Pecam1/Vcam1/Sdc3/Cd34/Cldn13/Cldn5/Cadm1/Cdh2/Sdc2/Ptprd/Itgb8/Alcam/H2-Ab1/H2-Aa/H2-Eb1/Cd8a/H2-T3/Cldn4/Cldn9/Cldn8/Cldn7/Mpz/Nfasc/Cadm3/Mag/Nrxn1/Nrxn3/Cntn1/Ncam2/Nrxn2/Cntnap2/Cldn11/Cntn2	35	GEN	KEGG
mmu04974	Protein digestion and absorption	25/430	108/9040	2.39561e-11	3.48561e-09	2.63517e-09	Atp1b1/Atp1a1/Col5a1/Col4a1/Eln/Cpa3/Col6a1/Col6a2/Col8a2/Col12a1/Mme/Col3a1/Col5a2/Col8a1/Col11a1/Col1a2/Atp1b2/Atp1a2/Col1a1/Col14a1/Col2a1/Col9a3/Col11a2/Slc36a1/Kcnq1	25	GEN	KEGG
mmu05020	Prion disease	35/430	268/9040	4.30587e-08	4.17669e-06	3.15763e-06	Il1a/Mapk3/Tubb2b/Atp5g3/Atp5o/Slc25a4/Tuba1b/Tubb4b/Vdac1/Cox6a1/Tubb2a/Hspa1a/Hspa1b/Cox6b1/CCl5/Ndufab1/Ndufa4/Ndufb6/Atp5g1/Cav1/Klc1/Tuba1a/Creb3l1/Cox6a2/C1qc/C1qb/C1qa/Tubb4a/Il6/Kif5c/Mapk10/Grin1/Ncam2/Kif5a/Tubb3	35	GEN	KEGG
mmu04721	Synaptic vesicle cycle	17/430	77/9040	8.36267e-08	6.08384e-06	4.59947e-06	Atp6v1b2/Vamp2/Stxbp1/Nsf/Atp6v0a1/Dnm3/Cltb/Atp6v0e2/Slc18a2/Slc1a3/Rab3a/Snap25/Syt1/Slc17a6/Dnm1/Atp6v1g2/Stx1b	17	GEN	KEGG
mmu05144	Malaria	14/430	57/9040	2.88908e-07	1.68145e-05	1.2712e-05	Pecam1/Vcam1/CCl2/Met/Hbb-bt/Gypa/Hba-a2/Ackr1/Hbb-bs/Cd36/Hba-a1/Sdc2/CCl12/Il6	14	GEN	KEGG
mmu05142	Chagas disease	18/430	103/9040	1.41833e-06	6.87889e-05	5.20053e-05	Mapk3/Gnas/CCl2/Fos/CCl5/Cd3e/Ace/Gnao1/Ppp2r2b/C1qc/C1qb/C1qa/CCl12/Serpine1/Gnai1/Ppp2r2c/Il6/Mapk10	18	GEN	KEGG
mmu05323	Rheumatoid arthritis	16/430	87/9040	2.72846e-06	0.000113426	8.57517e-05	Il1a/Atp6v1b2/CCl2/Fos/Cxcl1/CCl5/Atp6v0a1/Flt1/Cxcl12/Atp6v0e2/H2-Ab1/H2-Aa/H2-Eb1/CCl12/Il6/Atp6v1g2	16	GEN	KEGG
mmu04964	Proximal tubule bicarbonate reclamation	8/430	22/9040	4.35526e-06	0.000158423	0.00011977	Atp1b1/Atp1a1/Mdh1/Aqp1/Car2/Car4/Atp1b2/Atp1a2	8	GEN	KEGG
mmu05012	Parkinson disease	30/430	264/9040	7.6405e-06	0.000226308	0.000171092	Tubb2b/Gnas/Atp5g3/Calm2/Atp5o/Slc25a4/Tuba1b/Tubb4b/Vdac1/Cox6a1/Tubb2a/Cox6b1/Ndufab1/Ndufa4/Ndufb6/Atp5g1/Snca/Klc1/Tuba1a/Slc18a2/Cox6a2/Mapt/Gnai1/Tubb4a/Kif5c/Mapk10/Uchl1/Kif5a/Tubb3/Calml4	30	GEN	KEGG
mmu04640	Hematopoietic cell lineage	16/430	94/9040	7.77692e-06	0.000226308	0.000171092	Il1a/Tfrc/Cd3e/Cd7/Cd34/Gypa/Cd36/Cd59a/Mme/Ms4a1/H2-Ab1/H2-Aa/H2-Eb1/Siglech/Cd8a/Il6	16	GEN	KEGG
GO:0007409	axonogenesis	67/807	482/23328	1.8196e-22	9.229e-19	5.54882e-19	L1cam/Cnp/Tubb2b/Ablim1/Atp5g1/Dpysl2/Rab3a/Kel/Ache/Bsg/Olfm1/Fn1/Nr4a2/Rtn4/Apoe/App/Thy1/Gata3/Uchl1/Map1b/Map2/Kif5c/Ndn/Pak3/Dclk1/Nfasc/Ctnna2/Snap91/Crmp1/Grin1/Epha5/Vstm2l/Dpysl5/Nefm/Stxbp1/Tubb3/Map1a/Kif5a/Ntrk2/Mapt/Ank3/Gap43/Enah/Dst/Rufy3/Reln/Atl1/Etv1/Sema5a/Cxcl12/Sema3g/Nfib/Nrp2/Ntn1/Scn1b/Lrp2/Gas1/Notch3/Cdh11/Pmp22/Mag/CCk/Chl1/Otx2/Ptprz1/Fgf13/Isl1	67	DEX	BP
GO:0043270	positive regulation of ion transport	55/807	334/23328	3.86437e-22	9.80004e-19	5.89215e-19	Il1a/CCl4/Cxcl1/Atp1b1/Gnas/Mif/Ctss/S100a1/Dbi/Cxcl10/Arc/Dpysl2/Snca/Slc25a4/Rtn4/CCl2/Apoe/CCl5/Xcl1/Thy1/Ifng/F2r/Ehd3/Syt4/Gal/Syt1/Cacna2d1/Rab3b/Cntn1/Cacnb3/Grin1/Fgf12/Dpp6/Stxbp1/Tcaf1/Ank3/Ank2/Pcp4/Atp1b2/Reln/Slc12a2/Fhl1/Abcb1a/Cxcl12/Cav1/Edn1/Slc9a3r2/Mylk/Scn1b/Fxyd1/Plp1/Akap6/CCk/CCl12/Serpine1	55	DEX	BP
GO:0009611	response to wounding	64/807	492/23328	5.71883e-20	9.66864e-17	5.81314e-17	Il1a/Acta2/Sdc4/Gnas/Mif/Serpinb2/Serpine2/Rab3a/Slc4a1/Aqp1/Dmtn/Gata1/Tspan8/Cd36/Prdx2/Tpm1/CCr2/F13a1/Fkbp1b/Klf4/Anxa6/Fn1/Anxa5/Rtn4/CCl2/Cfh/Apoe/F2r/Stxbp1/Syt11/Nol3/Gap43/Dst/Ptn/Serping1/Slc12a2/Cd151/Hbegf/F3/Cav1/Kdr/Cd34/Gata2/Procr/Plpp3/Gja1/Mylk/Cldn4/Dsp/Mdk/Dpysl3/Col3a1/Lox/Mmp2/Mustn1/Fgf1/Col1a1/Slc1a3/Mag/Krt6a/Anxa8/Plet1/Serpine1/Igf1	64	DEX	BP
GO:0042060	wound healing	52/807	349/23328	5.19839e-19	6.59156e-16	3.96309e-16	Il1a/Acta2/Sdc4/Gnas/Serpinb2/Serpine2/Rab3a/Slc4a1/Aqp1/Dmtn/Gata1/Tspan8/Cd36/Prdx2/Tpm1/CCr2/F13a1/Anxa6/Fn1/Anxa5/CCl2/Cfh/Apoe/F2r/Stxbp1/Syt11/Dst/Serping1/Slc12a2/Cd151/Hbegf/F3/Cav1/Kdr/Cd34/Gata2/Procr/Plpp3/Gja1/Mylk/Cldn4/Dsp/Col3a1/Lox/Mustn1/Fgf1/Col1a1/Krt6a/Anxa8/Plet1/Serpine1/Igf1	52	DEX	BP
GO:0050673	epithelial cell proliferation	57/807	438/23328	6.55039e-18	6.64471e-15	3.99505e-15	Npm1/Igfbp4/Cdk6/Atpif1/CCnd1/CCnd2/Rtn4/CCl2/Apoe/Errfi1/Nr1d1/CCl5/Ifng/Gata3/Scg2/Ptprn/Dlk1/Maged1/Six1/Sox11/Ptn/Sema5a/Prl/F3/Flt1/Cxcl12/Cav1/Kdr/Cd34/Sparc/Igfbp3/Sgpp2/Nfib/Gata2/Gja1/Nr2f2/Sox9/Cnmd/Gas1/Mdk/Igfbp5/Fap/Col8a2/Col8a1/Serpinf1/Fgf1/Ednrb/Fabp7/Sfn/Osr2/Ehf/Serpinb5/Sfrp1/CCl12/Aldh1a2/Isl1/Igf1	57	DEX	BP
GO:0010959	regulation of metal ion transport	56/807	427/23328	9.04192e-18	7.64344e-15	4.59552e-15	CCl4/Cxcl1/Atp1b1/Gnas/Vamp2/Mif/Ywhah/S100a1/Serpine2/Dbi/Cxcl10/Fkbp1a/Snca/Kel/Fkbp1b/Atp1a1/CCl5/Xcl1/Thy1/Ifng/F2r/Ehd3/Gal/Gnao1/Cbarp/Cacna2d1/Cntn1/Cacnb3/Grin1/Fgf12/Dpp6/Jph3/Nol3/Ank3/Ank2/Atp1b2/Fxyd6/Fhl1/Cxcl12/Cav1/Ace/Gja1/Mylk/Scn1b/Fxyd1/Fxyd3/Pln/Atp1a2/Rgs4/Kcnab1/Plp1/Akap6/CCl12/Serpine1/Fgf13/Igf1	56	DEX	BP
GO:0019932	second-messenger-mediated signaling	56/807	445/23328	5.95719e-17	4.31641e-14	2.59518e-14	CCl4/L1cam/Atp1b1/Gnas/Vcam1/Mt1/Mt2/Cxcl10/Fkbp1a/Aqp1/Dmtn/Cd36/CCr2/CCr9/Cx3cr1/Fkbp1b/Apoe/App/Cd3e/Cxcr6/Cd8a/Aplp1/Gal/Chga/Prkar1b/Pclo/Rit2/Rundc3a/Epha5/Jph3/Rasd1/Ntrk2/Mapt/Ank2/Adgrl1/Ncald/Rcan2/Rcan1/Camta1/Gnal/Ramp2/Kdr/Edn1/Adgrg6/Sox9/Pln/Pde3a/S1pr3/Lpar1/Gnai1/Ednrb/Pex5l/Akap6/Calm4/Edn2/Igf1	56	DEX	BP
GO:0030198	extracellular matrix organization	45/807	302/23328	1.28913e-16	7.43157e-14	4.46814e-14	Ctss/Fn1/Mmp19/App/Aplp1/Spock2/Aebp1/Col1a2/Creb3l1/Sema5a/Fscn1/Serpinh1/Cav1/Ramp2/Col4a1/Eln/Adamts1/Fbln2/Fbln5/Nid1/Sox9/Mia/Col14a1/Col11a1/Gas2/Gpm6b/Col11a2/Myh11/Col3a1/Col5a2/Lum/Scara3/Lox/Mmp2/Fap/Cyp1b1/Col8a2/Abi3bp/Olfml2b/Col8a1/Adamts5/Pmp22/Col1a1/Col9a3/Serpinb5	45	DEX	BP
GO:0043062	extracellular structure organization	45/807	303/23328	1.46522e-16	7.43157e-14	4.46814e-14	Ctss/Fn1/Mmp19/App/Aplp1/Spock2/Aebp1/Col1a2/Creb3l1/Sema5a/Fscn1/Serpinh1/Cav1/Ramp2/Col4a1/Eln/Adamts1/Fbln2/Fbln5/Nid1/Sox9/Mia/Col14a1/Col11a1/Gas2/Gpm6b/Col11a2/Myh11/Col3a1/Col5a2/Lum/Scara3/Lox/Mmp2/Fap/Cyp1b1/Col8a2/Abi3bp/Olfml2b/Col8a1/Adamts5/Pmp22/Col1a1/Col9a3/Serpinb5	45	DEX	BP
GO:0060326	cell chemotaxis	45/807	303/23328	1.46522e-16	7.43157e-14	4.46814e-14	Il23a/CCl4/Cxcl1/Mapk3/Mif/Vcam1/Cxcl10/CCr2/CCr9/Cx3cr1/CCl9/Cd74/CCl2/App/CCl5/Xcl1/Ifng/Cxcr6/Scg2/Chga/Cxcl14/Ptn/Enpp2/Slc12a2/Sema5a/Parva/Hbegf/Flt1/Cxcl12/Kdr/Edn1/Hspb1/Rarres2/Mdk/Nbl1/Lox/Lpar1/Fgf1/Spp1/Ednrb/S100a14/CCl12/CCl7/Serpine1/Edn2	45	DEX	BP
GO:0062023	collagen-containing extracellular matrix	73/817	385/23271	9.12792e-33	4.73739e-30	2.98819e-30	Timp2/S100a10/Fcnb/Elane/Serpine2/Lgals1/Ache/F13a1/Ctsc/Anxa6/Fn1/Anxa5/Vwa5a/Vcan/Gh/Spock2/Bcan/Col1a2/Ptn/Reln/Angpt1/Serping1/Serpinb6a/Cd151/F3/Serpinh1/Igfbp7/Sparcl1/Col4a1/Mmrn2/Ltbp4/Eln/Sparc/Timp3/Adamts1/Fbln2/Fbln5/Mgp/Ntn1/Nid1/Itih5/Sod3/Prelp/Rarres2/Col14a1/Ogn/Bgn/Col11a1/Col11a2/Dcn/Col3a1/Col5a2/Col6a1/Col6a2/Aspn/Lum/Fmod/Lox/Col12a1/Col8a2/Abi3bp/Col8a1/Adamts5/Serpinf1/Pmp…	73	DEX	CC
GO:0043209	myelin sheath	47/817	213/23271	2.09114e-24	5.4265e-22	3.42286e-22	Mbp/Atp1b1/Cnp/Hspd1/Mif/Gstm1/Ass1/Tuba1b/Ywhag/Dpysl2/Car2/Hba-a1/Prdx2/Slc25a4/Atp1a1/Rtn4/Tuba1a/Thy1/Ehd3/Uchl1/Snap25/Gnao1/Eno2/Eef1a2/Ina/Tubb4a/Syn1/Nfasc/Cntn1/Nefm/Stxbp1/Tagln3/Ckmt1/Ckb/Pacsin1/Syn2/Napb/Dnm1/Fscn1/Cldn5/Cryab/Ldhb/Atp1a2/Pmp22/Plp1/Mpz/Mag	47	DEX	CC
GO:0150034	distal axon	62/817	384/23271	5.15235e-24	8.91357e-22	5.62239e-22	L1cam/Timp2/Atp5g1/Dpysl2/Rab3a/Fkbp1a/Aqp1/Blvrb/Snca/Olfm1/Anxa5/Rtn4/CCl2/App/Thy1/Map1b/Snap25/Syp/Ptprn/Cbarp/Map2/Eno2/Nrsn1/Pclo/Nrxn1/Kif5c/Calb1/Rasgrf1/Kcnk2/Gabrb3/Snap91/Crmp1/Grin1/Mapk8ip1/Tmod2/Cdk5r2/Tubb3/Clu/Syt11/Kif5a/Ntrk2/Fez1/Mapt/Pfn2/Cpeb1/Elavl4/Pacsin1/Adgrl1/Rufy3/Penk/Fscn1/Klc1/Stmn2/Lrp2/Dpysl3/Sncg/Kcna6/Pcdh9/CCk/Otx2/Ptprz1/Fgf13	62	DEX	CC
GO:0030426	growth cone	42/817	209/23271	2.67761e-20	3.4742e-18	2.19141e-18	L1cam/Timp2/Dpysl2/Snca/Olfm1/Rtn4/App/Thy1/Map1b/Snap25/Cbarp/Map2/Eno2/Nrsn1/Pclo/Nrxn1/Kif5c/Rasgrf1/Crmp1/Grin1/Mapk8ip1/Tmod2/Cdk5r2/Tubb3/Clu/Kif5a/Ntrk2/Fez1/Mapt/Cpeb1/Elavl4/Adgrl1/Rufy3/Fscn1/Klc1/Stmn2/Lrp2/Dpysl3/Pcdh9/Otx2/Ptprz1/Fgf13	42	DEX	CC
GO:0030427	site of polarized growth	42/817	216/23271	9.87233e-20	1.02475e-17	6.46378e-18	L1cam/Timp2/Dpysl2/Snca/Olfm1/Rtn4/App/Thy1/Map1b/Snap25/Cbarp/Map2/Eno2/Nrsn1/Pclo/Nrxn1/Kif5c/Rasgrf1/Crmp1/Grin1/Mapk8ip1/Tmod2/Cdk5r2/Tubb3/Clu/Kif5a/Ntrk2/Fez1/Mapt/Cpeb1/Elavl4/Adgrl1/Rufy3/Fscn1/Klc1/Stmn2/Lrp2/Dpysl3/Pcdh9/Otx2/Ptprz1/Fgf13	42	DEX	CC
GO:0098984	neuron to neuron synapse	57/817	433/23271	7.48746e-18	6.47665e-16	4.08526e-16	Ablim1/Nrgn/Cnn3/Arc/Dmtn/Add2/Cadm1/Atp1a1/Fabp5/Rtn4/Dnajb1/Camk2n1/Map1b/Syp/Gng3/Syt1/Prkar1b/Map2/Pclo/Calb1/Sh3gl2/Mapk8ip2/Pak3/Syn1/Dclk1/Mapk10/Ctnna2/Snap91/Clstn3/Grin1/Nefm/Map1a/Syt11/Snap47/Ntrk2/Mapt/Cpeb1/Ank2/Pacsin1/Syn2/Dnm3/Adgrl1/Ptprd/Epb41l3/Gap43/Dst/Dnm1/Atp1b2/Dynll2/Penk/Zdhhc2/Map4/Hspb1/Cald1/Cryab/Rgs7bp/Ptprz1	57	DEX	CC
GO:0045121	membrane raft	51/817	379/23271	1.69809e-16	1.23088e-14	7.76397e-15	L1cam/Mapk3/Atp1b1/Sdc4/Gnas/S100a10/Hspd1/Prtn3/Arc/Aqp1/Add2/Cd36/Bsg/Slc25a4/Atp1a1/Hspa1a/Tuba1a/App/Thy1/Cd8a/F2r/Ms4a1/Snap25/Cpe/Eno2/Rit2/Clip3/Cntn1/Mapt/Faim2/Angpt1/Serpinh1/Slc2a1/Cav1/Kdr/Cavin2/Cavin1/Plvap/Emp2/Mal/Plpp3/Gja1/Lrp2/Fxyd1/Ldhb/Gpm6b/Atp1a2/Gnai1/Ednrb/Mme/Akap6	51	DEX	CC
GO:0098857	membrane microdomain	51/817	380/23271	1.8973e-16	1.23088e-14	7.76397e-15	L1cam/Mapk3/Atp1b1/Sdc4/Gnas/S100a10/Hspd1/Prtn3/Arc/Aqp1/Add2/Cd36/Bsg/Slc25a4/Atp1a1/Hspa1a/Tuba1a/App/Thy1/Cd8a/F2r/Ms4a1/Snap25/Cpe/Eno2/Rit2/Clip3/Cntn1/Mapt/Faim2/Angpt1/Serpinh1/Slc2a1/Cav1/Kdr/Cavin2/Cavin1/Plvap/Emp2/Mal/Plpp3/Gja1/Lrp2/Fxyd1/Ldhb/Gpm6b/Atp1a2/Gnai1/Ednrb/Mme/Akap6	51	DEX	CC
GO:0098589	membrane region	51/817	393/23271	7.73897e-16	4.4628e-14	2.81499e-14	L1cam/Mapk3/Atp1b1/Sdc4/Gnas/S100a10/Hspd1/Prtn3/Arc/Aqp1/Add2/Cd36/Bsg/Slc25a4/Atp1a1/Hspa1a/Tuba1a/App/Thy1/Cd8a/F2r/Ms4a1/Snap25/Cpe/Eno2/Rit2/Clip3/Cntn1/Mapt/Faim2/Angpt1/Serpinh1/Slc2a1/Cav1/Kdr/Cavin2/Cavin1/Plvap/Emp2/Mal/Plpp3/Gja1/Lrp2/Fxyd1/Ldhb/Gpm6b/Atp1a2/Gnai1/Ednrb/Mme/Akap6	51	DEX	CC
GO:0005581	collagen trimer	23/817	81/23271	3.59047e-15	1.86345e-13	1.17541e-13	Fcnb/Col1a2/Col4a1/Col14a1/Col11a1/Col11a2/Dcn/Col3a1/Col5a2/Col6a1/Col6a2/Lum/Scara3/Lox/Col12a1/Col8a2/Col8a1/Col1a1/Gldn/Col9a3/C1qc/C1qb/C1qa	23	DEX	CC
GO:0005201	extracellular matrix structural constituent	37/791	148/22669	1.42626e-21	1.15527e-18	8.49748e-19	Fn1/Vwa5a/Vcan/Spock2/Col1a2/Reln/Igfbp7/Col4a1/Mmrn2/Ltbp4/Eln/Sparc/Fbln2/Fbln5/Ntn1/Nid1/Prelp/Col14a1/Ogn/Bgn/Col11a1/Col11a2/Dcn/Col3a1/Col5a2/Col6a1/Col6a2/Aspn/Lum/Scara3/Col12a1/Col8a2/Abi3bp/Col8a1/Col1a1/Col9a3/Igfbp6	37	DEX	MF
GO:0005539	glycosaminoglycan binding	37/791	213/22669	5.84545e-16	2.36741e-13	1.74133e-13	Lpl/Mpo/Ctsg/Elane/Serpine2/Cxcl10/Anxa6/Fn1/CCl2/Cfh/Vcan/Apoe/App/CCl5/Aplp1/Spock2/Fgf12/Bcan/Ptn/Sema5a/Hbegf/Adamts1/Nrp2/Fstl1/Prelp/Rspo3/Bgn/Col11a1/Pcolce/Mdk/Dpysl3/Dcn/Abi3bp/Adamts5/Fgf1/Sfrp1/CCl7	37	DEX	MF
GO:0050839	cell adhesion molecule binding	42/791	284/22669	2.35796e-15	6.3665e-13	4.68283e-13	L1cam/Timp2/Vcam1/Tspan8/Bsg/Fn1/Cadm1/Rtn4/App/Thy1/Cpe/Nrxn1/Nfasc/Ctnna2/Vstm2l/Epcam/Ank3/Edil3/Adgrl1/Ptprd/Ptn/Cd151/Ptprb/Cxcl12/Kdr/Esam/Bcam/Emp2/Plpp3/Fbln5/Dsp/Pkp1/Itgb8/Col3a1/Cdh11/Fap/S1pr3/Fgf1/Spp1/Gldn/Ptprz1/Igf1	42	DEX	MF
GO:1901681	sulfur compound binding	38/791	260/22669	7.53274e-14	1.52538e-11	1.12198e-11	Lpl/Mpo/Ctsg/Elane/Gstm1/Serpine2/Dbi/Cxcl10/Anxa6/Fn1/Acot7/CCl2/Cfh/Apoe/App/CCl5/Aplp1/Fgf12/Ptn/Sema5a/Hbegf/Cd34/Adamts1/Nrp2/Fstl1/Gstm2/Prelp/Gsta4/Rspo3/Col11a1/Pcolce/Mdk/Dpysl3/Abi3bp/Adamts5/Fgf1/Sfrp1/CCl7	38	DEX	MF
GO:0008201	heparin binding	29/791	156/22669	1.39668e-13	2.26262e-11	1.66425e-11	Lpl/Mpo/Ctsg/Elane/Serpine2/Cxcl10/Fn1/CCl2/Cfh/Apoe/App/CCl5/Aplp1/Fgf12/Ptn/Hbegf/Adamts1/Nrp2/Fstl1/Prelp/Rspo3/Col11a1/Pcolce/Mdk/Abi3bp/Adamts5/Fgf1/Sfrp1/CCl7	29	DEX	MF
GO:0050840	extracellular matrix binding	17/791	61/22669	1.81125e-11	2.44518e-09	1.79854e-09	Ctss/Lgals1/Ache/Spock2/Sparcl1/Bcam/Eln/Sparc/Fbln2/Nid1/Adgrg6/Bgn/Dcn/Olfml2b/Adamts5/Spp1/Lypd3	17	DEX	MF
GO:0030020	extracellular matrix structural constituent conferring tensile strength	13/791	38/22669	2.49135e-10	2.88284e-08	2.12045e-08	Col1a2/Col4a1/Col14a1/Col11a1/Col11a2/Col3a1/Col5a2/Col6a1/Col6a2/Col12a1/Col8a1/Col1a1/Col9a3	13	DEX	MF
GO:0005178	integrin binding	23/791	136/22669	3.39373e-10	3.43615e-08	2.52743e-08	L1cam/Timp2/Vcam1/Tspan8/Fn1/App/Thy1/Edil3/Ptn/Cd151/Cxcl12/Kdr/Emp2/Plpp3/Fbln5/Itgb8/Col3a1/Fap/S1pr3/Fgf1/Spp1/Ptprz1/Igf1	23	DEX	MF
GO:0001664	G protein-coupled receptor binding	35/791	310/22669	1.10631e-09	9.95683e-08	7.32368e-08	CCl4/Cxcl1/Gnas/Fcnb/Cxcl10/Tac2/CCl9/Hspa1a/CCl2/App/CCl5/Xcl1/Uchl1/Aplp1/Gal/Gnao1/Cxcl14/Gprasp2/Reep2/Dnm3/Dnm1/Penk/Gnal/Pomc/Cxcl12/Edn1/Ace/Rspo3/Gnai1/Ednrb/S100a14/Sfrp1/CCl12/CCl7/Edn2	35	DEX	MF
GO:0005518	collagen binding	16/791	71/22669	2.21422e-09	1.71819e-07	1.2638e-07	Ctss/Ache/Map1a/Aebp1/Serpinh1/Sparcl1/Sparc/Nid1/Pcolce/Dcn/Col6a1/Col6a2/Aspn/Lum/Lox/Abi3bp	16	DEX	MF
mmu05142	Chagas disease	20/418	103/9040	3.75967e-08	8.34549e-06	6.27047e-06	Fos/Mapk3/Gnas/CCl2/CCl5/Cd3e/Ifng/Gnao1/Mapk10/Ppp2r2c/Ppp2r2b/Gnal/Ace/Gnai1/C1qc/C1qb/C1qa/CCl12/Ifnb1/Serpine1	20	DEX	KEGG
mmu04514	Cell adhesion molecules	27/418	182/9040	6.56356e-08	8.34549e-06	6.27047e-06	L1cam/Sdc4/Vcam1/Cldn13/Cadm1/H2-Aa/H2-Ab1/H2-Eb1/Vcan/Icos/Cd8b1/Cd8a/Nrxn1/Nfasc/Cntn1/Cldn9/Cntnap2/Ptprd/Sdc2/Cldn5/Esam/Cd34/Cldn4/Cldn8/Itgb8/Mpz/Mag	27	DEX	KEGG
mmu04974	Protein digestion and absorption	20/418	108/9040	8.63326e-08	8.34549e-06	6.27047e-06	Atp1b1/Atp1a1/Atp1b2/Col1a2/Col4a1/Eln/Col14a1/Col11a1/Col11a2/Col3a1/Col5a2/Col6a1/Col6a2/Atp1a2/Col12a1/Col8a2/Col8a1/Col1a1/Col9a3/Mme	20	DEX	KEGG
mmu04640	Hematopoietic cell lineage	17/418	94/9040	1.14985e-06	8.33639e-05	6.26364e-05	Il1a/Tfrc/Gypa/Cd36/Cd59a/Siglech/Cd7/H2-Aa/H2-Ab1/H2-Eb1/Cd3e/Cd8b1/Cd8a/Ms4a1/Dntt/Cd34/Mme	17	DEX	KEGG
mmu05323	Rheumatoid arthritis	16/418	87/9040	1.88624e-06	0.000109402	8.22003e-05	Il1a/Il23a/Fos/Cxcl1/H2-Aa/H2-Ab1/H2-Eb1/CCl2/CCl5/Ifng/Atp6v0e2/Angpt1/Atp6v1g2/Flt1/Cxcl12/CCl12	16	DEX	KEGG
mmu04510	Focal adhesion	25/418	203/9040	6.77706e-06	0.000327558	0.000246114	Mapk3/CCnd1/Emp1/Fn1/CCnd2/Pak3/Rasgrf1/Mapk10/Col1a2/Reln/Parva/Flt1/Cav1/Col4a1/Kdr/Emp2/Mylk/Itgb8/Myl9/Col6a1/Col6a2/Col1a1/Spp1/Col9a3/Igf1	25	DEX	KEGG
mmu05418	Fluid shear stress and atherosclerosis	20/418	147/9040	1.30399e-05	0.000508751	0.000382255	Il1a/Fos/Sdc4/Vcam1/Gstm1/Ass1/Mgst3/CCl2/Ifng/Mapk10/Sdc2/Cav1/Kdr/Edn1/Plat/Gstm2/Gsta4/Mmp2/Calm4/CCl12	20	DEX	KEGG
mmu04933	AGE-RAGE signaling pathway in diabetic complications	16/418	101/9040	1.40345e-05	0.000508751	0.000382255	Il1a/Mapk3/Vcam1/CCnd1/Fn1/CCl2/Mapk10/Col1a2/F3/Col4a1/Edn1/Col3a1/Mmp2/Col1a1/CCl12/Serpine1	16	DEX	KEGG
mmu04610	Complement and coagulation cascades	15/418	94/9040	2.37798e-05	0.000766237	0.000575721	Serpinb2/Serpine2/Cd59a/F13a1/Cfh/F2r/Clu/Serping1/F3/Procr/Plat/C1qc/C1qb/C1qa/Serpine1	15	DEX	KEGG
mmu04061	Viral protein interaction with cytokine and cytokine receptor	15/418	95/9040	2.70663e-05	0.000784924	0.000589761	CCl4/Cxcl1/Cxcl10/CCr2/CCr9/Cx3cr1/CCl9/CCl2/CCl5/Xcl1/Il2rb/Cxcl14/Cxcl12/CCl12/CCl7	15	DEX	KEGG
